# Supplementary material for: Plasma induced tungsten doping of TiO2 particles for enhancement of photocatalysis under visible light
Source: Royal Society of Chemistry journal article supplement (doi:10.1039/c5cp03400k), 2015-01-01
Supplement: c5cp03400k1.pdf [file c5cp03400k1.pdf]

**Supporting Information to**

**Plasma Induced Tungsten Doping to TiO<sub>2</sub> Particles for Enhancement  
of Photocatalysis under Visible Light**

Yohei Ishida<sup>a</sup>, Yasutomo Motokane<sup>a</sup>, Tomoharu Tokunaga<sup>b</sup>, and Tetsu Yonezawa<sup>a,\*</sup>

*<sup>a</sup>Division of Material Science and Engineering, Faculty of Engineering, Hokkaido  
University, Kita 13 Nishi 8, Kita-ku, Sapporo, Hokkaido 060-8628, Japan.*

*<sup>b</sup>Department of Quantum Engineering, Graduate School of Engineering, Nagoya  
University, Furo-cho, Chikusa-ku, Aichi, Nagoya 464-8603, Japan*

\*Corresponding author E-mail address: [tetsu@eng.hokudai.ac.jp](mailto:tetsu@eng.hokudai.ac.jp)

Sample preparation for ICP-AES (Thermo SCIENTIFIC, iCAP 6000)

100 mg of resultant  $\text{TiO}_2$  nanoparticles was added in the 150 mL of PTFE beaker. Hydrogen peroxide (10 mL, Kanto) and nitric acid (2 mL, Kanto) were added, and heated at 120 °C for 3h. The solution was then cooled to room temperature. 8 mL of nitric acid and 2 mL of hydrofluoric acid (stella-chemifa) were added and heated at 120 °C. After the evaporation of solution until the 3 mL remained, the resultant solution was diluted with 10 mL of 2% nitric acid aqueous solution for ICP-AES measurement. Standard solutions of Ti and W (Wako, atomic absorption spectrometry reagent) were used for the calibration of the equipment.

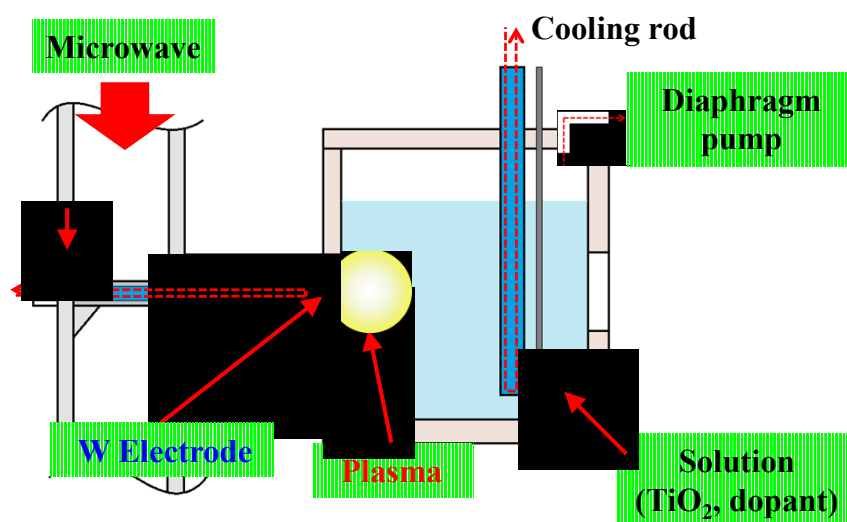

**Figure S1.** Experimental setup of microwave-induced plasma.

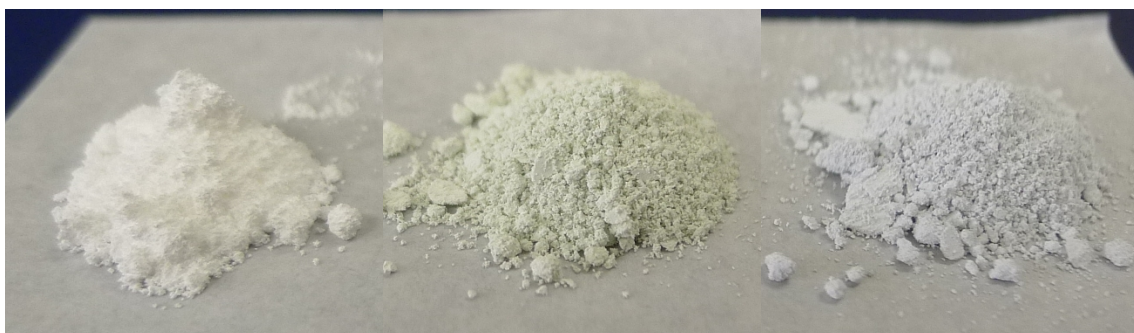

**Figure S2.** Photographs of decahedral TiO<sub>2</sub> nanoparticles. From left: bare decahedral TiO<sub>2</sub>, after 40 min plasma treatment, and after alkaline treatment.

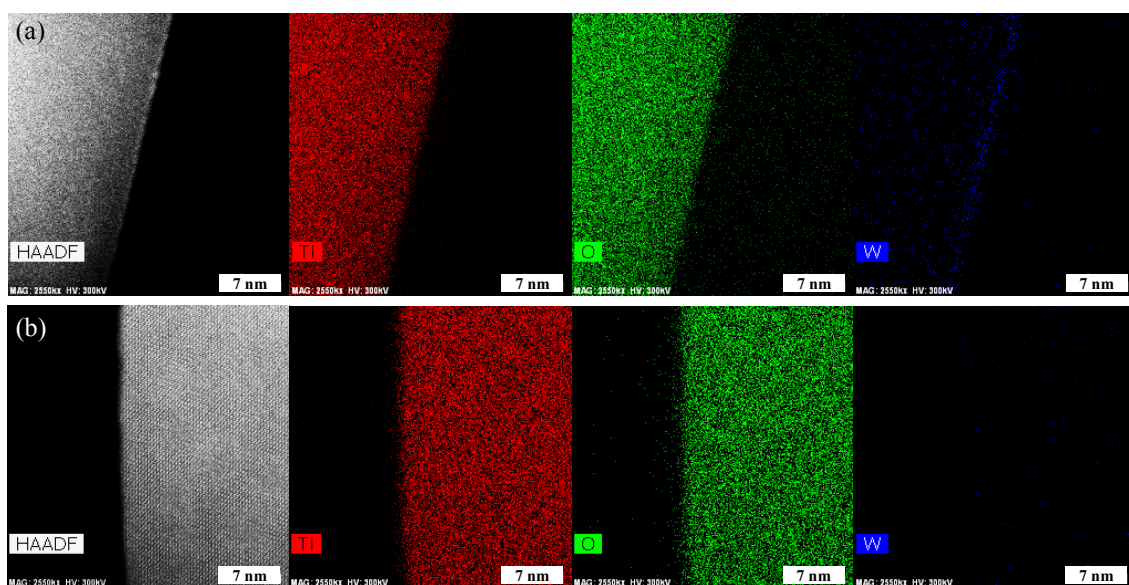

**Figure S3.** HAADF-STEM image and EDX mapping of plasma-treated decahedral  $\text{TiO}_2$  nanoparticles before (a) and after (b) the alkaline treatment.

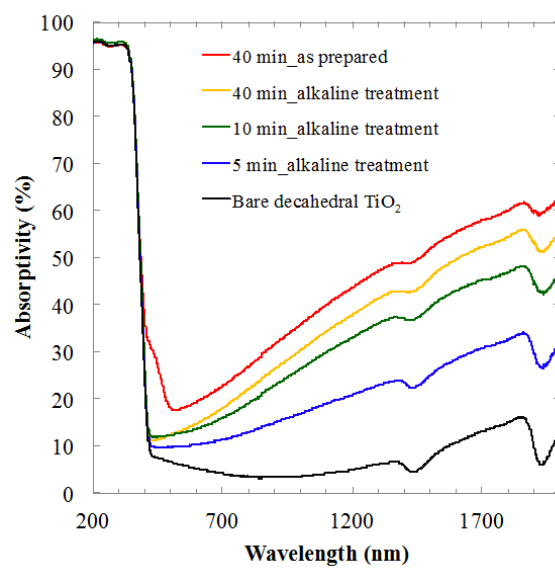

**Figure S4.** Diffuse reflectance spectra of plasma-treated TiO<sub>2</sub> nanoparticles for 200-2000 nm.

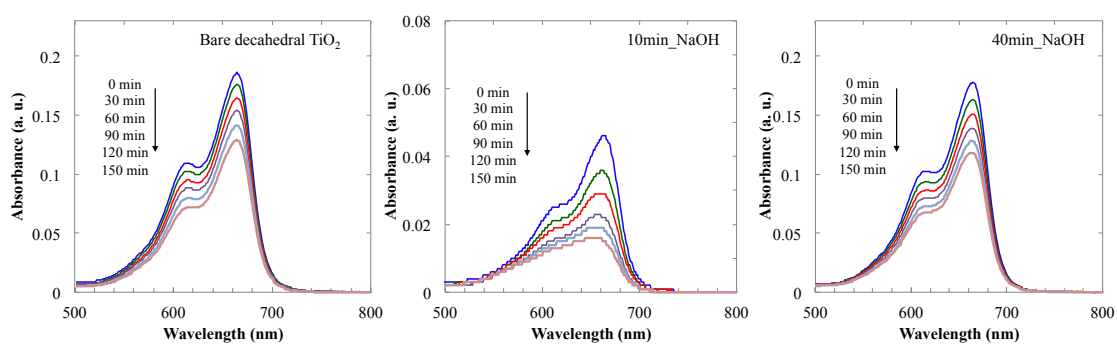

Figure S5. Absorption spectra of MB excited above 440 nm with time.
